# Supplementary material for: Appetitive Traits in a Population-Based Study of Polish Adolescents within the PLACE-19 Study: Validation of the Adult Eating Behavior Questionnaire
Source: Nutrients. 2020 Dec 19;12(12):3889. doi: 10.3390/nu12123889 (PMC7766569; doi:10.3390/nu12123889)
Supplement: Supplementary file 1 [file nutrients-12-03889-s001.pdf]

# Appetitive Traits in a Population-Based Study of Polish Adolescents: Validation of the Adult Eating Behaviour Questionnaire (AEBQ) and Assessment within PLACE-19 Study

Dominika Guzek <sup>1\*</sup>, Dominika Skolmowska <sup>2</sup>, Dominika Głąbska <sup>2</sup>

**Table S1.** Standardized factor loadings within Confirmatory Factor Analysis (CFA) with Weighted Least Squares (WLS) for 8-factors obtained for the Polish version of the Adult Eating Behavior Questionnaire.

| AEBQ subscale          | Items                                                          | Standardized factor loadings CFA with WLS | 95% Confidence Interval |       |
|------------------------|----------------------------------------------------------------|-------------------------------------------|-------------------------|-------|
|                        |                                                                |                                           | Lower                   | Upper |
| Hunger                 | I often notice my stomach rumbling                             | 0.377                                     | 0.339                   | 0.416 |
|                        | If I miss a meal I get irritable                               | 0.283                                     | 0.245                   | 0.321 |
|                        | I often feel so hungry that I have to eat something right away | 0.463                                     | 0.427                   | 0.499 |
|                        | I often feel hungry                                            | 0.579                                     | 0.547                   | 0.612 |
|                        | If my meals are delayed I get light-headed                     | 0.141                                     | 0.110                   | 0.172 |
| Food responsiveness    | I often feel hungry when I am with someone who is eating       | 0.444                                     | 0.408                   | 0.480 |
|                        | Given the choice, I would eat most of the time                 | 0.476                                     | 0.440                   | 0.512 |
|                        | I am always thinking about food                                | 0.301                                     | 0.267                   | 0.335 |
|                        | When I see or smell food that I like, it makes me want to eat  | 0.361                                     | 0.327                   | 0.395 |
| Emotional over-eating  | I eat more when I'm annoyed                                    | 0.577                                     | 0.545                   | 0.608 |
|                        | I eat more when I'm worried                                    | 0.529                                     | 0.497                   | 0.561 |
|                        | I eat more when I'm upset                                      | 0.406                                     | 0.370                   | 0.443 |
|                        | I eat more when I'm anxious                                    | 0.490                                     | 0.461                   | 0.520 |
|                        | I eat more when I'm angry                                      | 0.430                                     | 0.400                   | 0.459 |
| Enjoyment of food      | I love food                                                    | 0.652                                     | 0.625                   | 0.678 |
|                        | I enjoy eating                                                 | 0.643                                     | 0.618                   | 0.668 |
|                        | I look forward to mealtimes                                    | 0.588                                     | 0.558                   | 0.618 |
| Satiety responsiveness | I often leave food on my plate at the end of a meal            | 0.508                                     | 0.475                   | 0.541 |
|                        | I often get full before my meal is finished                    | 0.545                                     | 0.509                   | 0.580 |
|                        | I cannot eat a meal if I have had a snack just before          | 0.367                                     | 0.333                   | 0.401 |
|                        | I get full up easily                                           | 0.529                                     | 0.497                   | 0.560 |
| Emotional under-eating | I eat less when I'm worried                                    | 0.714                                     | 0.683                   | 0.745 |
|                        | I eat less when I'm angry                                      | 0.683                                     | 0.654                   | 0.713 |
|                        | I eat less when I'm upset                                      | 0.713                                     | 0.683                   | 0.743 |

|                    |                                                              |       |       |       |
|--------------------|--------------------------------------------------------------|-------|-------|-------|
|                    | I eat less when I'm annoyed                                  | 0.691 | 0.663 | 0.720 |
|                    | I eat less when I'm anxious                                  | 0.728 | 0.700 | 0.756 |
| Food fussiness     | I often decide that I don't like a food, before tasting it   | 0.727 | 0.696 | 0.757 |
|                    | I refuse new foods at first                                  | 0.614 | 0.589 | 0.640 |
|                    | I enjoy tasting new foods*                                   | 0.777 | 0.754 | 0.801 |
|                    | I am interested in tasting new food I haven't tasted before* | 0.829 | 0.805 | 0.854 |
|                    | I enjoy a wide variety of foods*                             | 0.625 | 0.597 | 0.652 |
| Slowness in eating | I often finish my meals quickly*                             | 0.626 | 0.597 | 0.655 |
|                    | I eat more and more slowly during the course of a meal       | 0.821 | 0.794 | 0.848 |
|                    | I eat slowly                                                 | 0.546 | 0.515 | 0.576 |
|                    | I am often last at finishing a meal                          | 0.755 | 0.729 | 0.781 |

\* Reverse items; CFA – Confirmatory Factor Analysis; WLS – Weighted Least Squares.

**Table S2.** Standardized factor loadings within Confirmatory Factor Analysis (CFA) with Weighted Least Squares (WLS) obtained for boys for the Polish version of the Adult Eating Behavior Questionnaire (AEBQ).

| AEBQ subscale          | Items                                                         | Standardized factor loadings CFA with WLS | 95% Confidence Interval |       |
|------------------------|---------------------------------------------------------------|-------------------------------------------|-------------------------|-------|
|                        |                                                               |                                           | Lower                   | Upper |
| Food Responsiveness    | I often feel hungry when I am with someone who is eating      | 0.538                                     | 0.472                   | 0.603 |
|                        | Given the choice, I would eat most of the time                | 0.480                                     | 0.427                   | 0.532 |
|                        | I am always thinking about food                               | 0.454                                     | 0.414                   | 0.494 |
|                        | When I see or smell food that I like, it makes me want to eat | 0.661                                     | 0.587                   | 0.735 |
| Emotional Over-Eating  | I eat more when I'm annoyed                                   | 0.628                                     | 0.578                   | 0.677 |
|                        | I eat more when I'm worried                                   | 0.563                                     | 0.519                   | 0.607 |
|                        | I eat more when I'm upset                                     | 0.399                                     | 0.333                   | 0.465 |
|                        | I eat more when I'm anxious                                   | 0.565                                     | 0.522                   | 0.608 |
|                        | I eat more when I'm angry                                     | 0.488                                     | 0.447                   | 0.528 |
| Enjoyment of Food      | I love food                                                   | 0.863                                     | 0.805                   | 0.920 |
|                        | I enjoy eating                                                | 0.865                                     | 0.808                   | 0.921 |
|                        | I look forward to mealtimes                                   | 0.669                                     | 0.609                   | 0.729 |
| Satiety Responsiveness | I often leave food on my plate at the end of a meal           | 0.519                                     | 0.466                   | 0.572 |
|                        | I often get full before my meal is finished                   | 0.561                                     | 0.493                   | 0.629 |
|                        | I cannot eat a meal if I have had a snack just before         | 0.380                                     | 0.321                   | 0.438 |
|                        | I get full up easily                                          | 0.626                                     | 0.560                   | 0.693 |
| Emotional Under-Eating | I eat less when I'm worried                                   | 0.645                                     | 0.593                   | 0.696 |
|                        | I eat less when I'm angry                                     | 0.558                                     | 0.509                   | 0.608 |
|                        | I eat less when I'm upset                                     | 0.639                                     | 0.594                   | 0.685 |
|                        | I eat less when I'm annoyed                                   | 0.575                                     | 0.533                   | 0.618 |
|                        | I eat less when I'm anxious                                   | 0.655                                     | 0.610                   | 0.699 |
| Food Fussiness         | I often decide that I don't like a food, before tasting it    | 0.309                                     | 0.248                   | 0.370 |
|                        | I refuse new foods at first                                   | 0.271                                     | 0.213                   | 0.328 |
|                        | I enjoy tasting new foods*                                    | 0.869                                     | 0.813                   | 0.925 |
|                        | I am interested in tasting new food I haven't tasted before*  | 0.912                                     | 0.854                   | 0.971 |
|                        | I enjoy a wide variety of foods*                              | 0.763                                     | 0.702                   | 0.824 |
|                        | I often finish my meals quickly*                              | 0.439                                     | 0.381                   | 0.496 |
| Slowness in Eating     | I eat more and more slowly during the course of a meal        | 0.778                                     | 0.721                   | 0.836 |
|                        | I eat slowly                                                  | 0.589                                     | 0.535                   | 0.643 |
|                        | I am often last at finishing a meal                           | 0.703                                     | 0.643                   | 0.763 |

\* Reverse items; CFA – Confirmatory Factor Analysis; WLS – Weighted Least Squares.

**Table S3.** Standardized factor loadings within Confirmatory Factor Analysis (CFA) with Weighted Least Squares (WLS) obtained for girls for the Polish version of the Adult Eating Behavior Questionnaire (AEBQ).

| AEBQ subscale          | Items                                                         | Standardized factor loadings CFA with WLS | 95% Confidence Interval |       |
|------------------------|---------------------------------------------------------------|-------------------------------------------|-------------------------|-------|
|                        |                                                               |                                           | Lower                   | Upper |
| Food Responsiveness    | I often feel hungry when I am with someone who is eating      | 0.533                                     | 0.484                   | 0.581 |
|                        | Given the choice, I would eat most of the time                | 0.620                                     | 0.575                   | 0.665 |
|                        | I am always thinking about food                               | 0.454                                     | 0.414                   | 0.494 |
|                        | When I see or smell food that I like, it makes me want to eat | 0.656                                     | 0.602                   | 0.711 |
| Emotional Over-Eating  | I eat more when I'm annoyed                                   | 0.779                                     | 0.734                   | 0.825 |
|                        | I eat more when I'm worried                                   | 0.762                                     | 0.718                   | 0.806 |
|                        | I eat more when I'm upset                                     | 0.403                                     | 0.337                   | 0.469 |
|                        | I eat more when I'm anxious                                   | 0.655                                     | 0.615                   | 0.694 |
|                        | I eat more when I'm angry                                     | 0.532                                     | 0.494                   | 0.571 |
| Enjoyment of Food      | I love food                                                   | 0.890                                     | 0.845                   | 0.936 |
|                        | I enjoy eating                                                | 0.905                                     | 0.861                   | 0.949 |
|                        | I look forward to mealtimes                                   | 0.684                                     | 0.639                   | 0.729 |
| Satiety Responsiveness | I often leave food on my plate at the end of a meal           | 0.519                                     | 0.466                   | 0.572 |
|                        | I often get full before my meal is finished                   | 0.704                                     | 0.649                   | 0.758 |
|                        | I cannot eat a meal if I have had a snack just before         | 0.449                                     | 0.396                   | 0.501 |
|                        | I get full up easily                                          | 0.710                                     | 0.657                   | 0.763 |
| Emotional Under-Eating | I eat less when I'm worried                                   | 0.805                                     | 0.752                   | 0.858 |
|                        | I eat less when I'm angry                                     | 0.774                                     | 0.726                   | 0.822 |
|                        | I eat less when I'm upset                                     | 0.825                                     | 0.776                   | 0.874 |
|                        | I eat less when I'm annoyed                                   | 0.817                                     | 0.773                   | 0.861 |
|                        | I eat less when I'm anxious                                   | 0.862                                     | 0.815                   | 0.908 |
| Food Fussiness         | I often decide that I don't like a food, before tasting it    | 0.309                                     | 0.248                   | 0.370 |
|                        | I refuse new foods at first                                   | 0.339                                     | 0.290                   | 0.388 |
|                        | I enjoy tasting new foods*                                    | 0.909                                     | 0.865                   | 0.953 |
|                        | I am interested in tasting new food I haven't tasted before*  | 0.963                                     | 0.916                   | 0.998 |
|                        | I enjoy a wide variety of foods*                              | 0.807                                     | 0.758                   | 0.856 |
|                        | I often finish my meals quickly*                              | 0.439                                     | 0.381                   | 0.496 |
| Slowness in Eating     | I eat more and more slowly during the course of a meal        | 0.894                                     | 0.844                   | 0.945 |
|                        | I eat slowly                                                  | 0.640                                     | 0.594                   | 0.686 |
|                        | I am often last at finishing a meal                           | 0.827                                     | 0.778                   | 0.876 |

\* Reverse items; CFA – Confirmatory Factor Analysis; WLS – Weighted Least Squares.

**Table S4.** The scores for items of the Adult Eating Behavior Questionnaire (AEBQ) in Polish adolescents.

| Subscale                        | Items                                                         | Mean | 95% Confidence Interval |
|---------------------------------|---------------------------------------------------------------|------|-------------------------|
| <b>Food approach subscales</b>  |                                                               |      |                         |
| Food Responsiveness             | I often feel hungry when I am with someone who is eating      | 2.72 | 2.68–2.75               |
|                                 | Given the choice, I would eat most of the time                | 2.53 | 2.50–2.57               |
|                                 | I am always thinking about food                               | 2.37 | 2.34–2.40               |
|                                 | When I see or smell food that I like, it makes me want to eat | 3.75 | 3.71–3.79               |
| Emotional Over-Eating           | I eat more when I'm annoyed                                   | 2.62 | 2.58–2.66               |
|                                 | I eat more when I'm worried                                   | 2.52 | 2.48–2.55               |
|                                 | I eat more when I'm upset                                     | 3.86 | 3.82–3.89               |
|                                 | I eat more when I'm anxious                                   | 2.50 | 2.46–2.53               |
|                                 | I eat more when I'm angry                                     | 2.42 | 2.39–2.45               |
| Enjoyment of Food               | I love food                                                   | 3.86 | 3.82–3.90               |
|                                 | I enjoy eating                                                | 3.78 | 3.74–3.82               |
|                                 | I look forward to mealtimes                                   | 3.09 | 3.05–3.13               |
| <b>Food avoidance subscales</b> |                                                               |      |                         |
| Satiety Responsiveness          | I often leave food on my plate at the end of a meal           | 2.68 | 2.65–2.72               |
|                                 | I often get full before my meal is finished                   | 3.01 | 2.97–3.05               |
|                                 | I cannot eat a meal if I have had a snack just before         | 2.66 | 2.63–2.70               |
|                                 | I get full up easily                                          | 3.16 | 3.12–3.20               |
| Emotional Under-Eating          | I eat less when I'm worried                                   | 2.93 | 2.89–2.98               |
|                                 | I eat less when I'm angry                                     | 2.76 | 2.72–2.80               |
|                                 | I eat less when I'm upset                                     | 2.79 | 2.75–2.83               |
|                                 | I eat less when I'm annoyed                                   | 2.66 | 2.63–2.70               |
|                                 | I eat less when I'm anxious                                   | 2.72 | 2.68–2.76               |
| Food Fussiness                  | I often decide that I don't like a food, before tasting it    | 3.06 | 3.01–3.10               |
|                                 | I refuse new foods at first                                   | 2.69 | 2.65–2.72               |
|                                 | I enjoy tasting new foods*                                    | 2.53 | 2.49–2.57               |
|                                 | I am interested in tasting new food I haven't tasted before*  | 2.55 | 2.50–2.59               |
|                                 | I enjoy a wide variety of foods*                              | 2.44 | 2.40–2.48               |
| Slowness in Eating              | I often finish my meals quickly*                              | 3.03 | 2.99–3.07               |
|                                 | I eat more and more slowly during the course of a meal        | 2.71 | 2.68–2.75               |
|                                 | I eat slowly                                                  | 3.08 | 3.04–3.12               |
|                                 | I am often last at finishing a meal                           | 2.88 | 2.84–2.92               |

\* Reverse items; \*  $p \leq 0.05$ ; \*\*  $p \leq 0.001$ .

**Table S5.** Correlation between Adult Eating Behavior Questionnaire (AEBQ) subscales in Polish boys.

| <b>AEBQ subscale</b>         | <b>FR</b> | <b>EOE</b> | <b>EF</b> | <b>SR</b> | <b>EUE</b> | <b>FF</b> | <b>SE</b> |
|------------------------------|-----------|------------|-----------|-----------|------------|-----------|-----------|
| Food Responsiveness (FR)     | -         |            |           |           |            |           |           |
| Emotional Over-Eating (EOE)  | 0.18**    | -          |           |           |            |           |           |
| Enjoyment of Food (EF)       | 0.58**    | 0.09*      | -         |           |            |           |           |
| Satiety Responsiveness (SR)  | 0.19**    | 0.11*      | 0.04      | -         |            |           |           |
| Emotional Under-Eating (EUE) | 0.35**    | 0.25**     | 0.18**    | 0.31**    | -          |           |           |
| Food Fussiness (FF)          | -0.24**   | 0.01       | -0.33**   | 0.05      | -0.11      | -         |           |
| Slowness in Eating (SE)      | 0.001     | 0.01       | -0.02     | 0.29**    | 0.08*      | 0.04      | -         |
| Total AEBQ                   | 0.60**    | 0.63**     | 0.46**    | 0.54**    | 0.63**     | 0.16**    | 0.39**    |

\*  $p \leq 0.05$ ; \*\*  $p \leq 0.001$ .

**Table S6.** Correlation between Adult Eating Behavior Questionnaire (AEBQ) subscales in Polish girls.

| AEBQ subscale                | FR      | EOE    | EF      | SR     | EUE    | FF      | SE     |
|------------------------------|---------|--------|---------|--------|--------|---------|--------|
| Food Responsiveness (FR)     | -       |        |         |        |        |         |        |
| Emotional Over-Eating (EOE)  | 0.25**  | -      |         |        |        |         |        |
| Enjoyment of Food (EF)       | 0.63**  | 0.23** | -       |        |        |         |        |
| Satiety Responsiveness (SR)  | 0.07*   | 0.03   | -0.04   | -      |        |         |        |
| Emotional Under-Eating (EUE) | 0.22**  | -0.06* | 0.08*   | 0.41** | -      |         |        |
| Food Fussiness (FF)          | -0.18** | -0.03  | -0.30** | 0.04   | -0.08* | -       |        |
| Slowness in Eating (SE)      | 0.04    | -0.01  | 0.02    | 0.32** | 0.23** | -0.09** | -      |
| Total AEBQ                   | 0.57**  | 0.55** | 0.40**  | 0.53** | 0.62** | 0.20**  | 0.45** |

\*  $p \leq 0.05$ ; \*\*  $p \leq 0.001$ .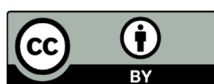

© 2020 by the authors. Licensee MDPI, Basel, Switzerland. This article is an open access article distributed under the terms and conditions of the Creative Commons Attribution (CC BY) license (<http://creativecommons.org/licenses/by/4.0/>).
